# Supplementary material for: Fluorine-free organic electrolytes for the stable electrodeposition of neodymium metal
Source: Royal Society of Chemistry journal article supplement (doi:10.1039/d3cp01262j), 2023-01-01
Supplement: d3cp01262j1.pdf [file d3cp01262j1.pdf]

# **Fluorine-free organic electrolytes for the stable electrodeposition of neodymium metal**

Pieter Geysens<sup>†</sup>, Da Tie<sup>‡</sup>, Alexandru Vlad<sup>‡</sup>, Jan Fransaer<sup>¶</sup>, Koen Binnemans<sup>†\*</sup>

*Electronic Supplementary Information (ESI)*

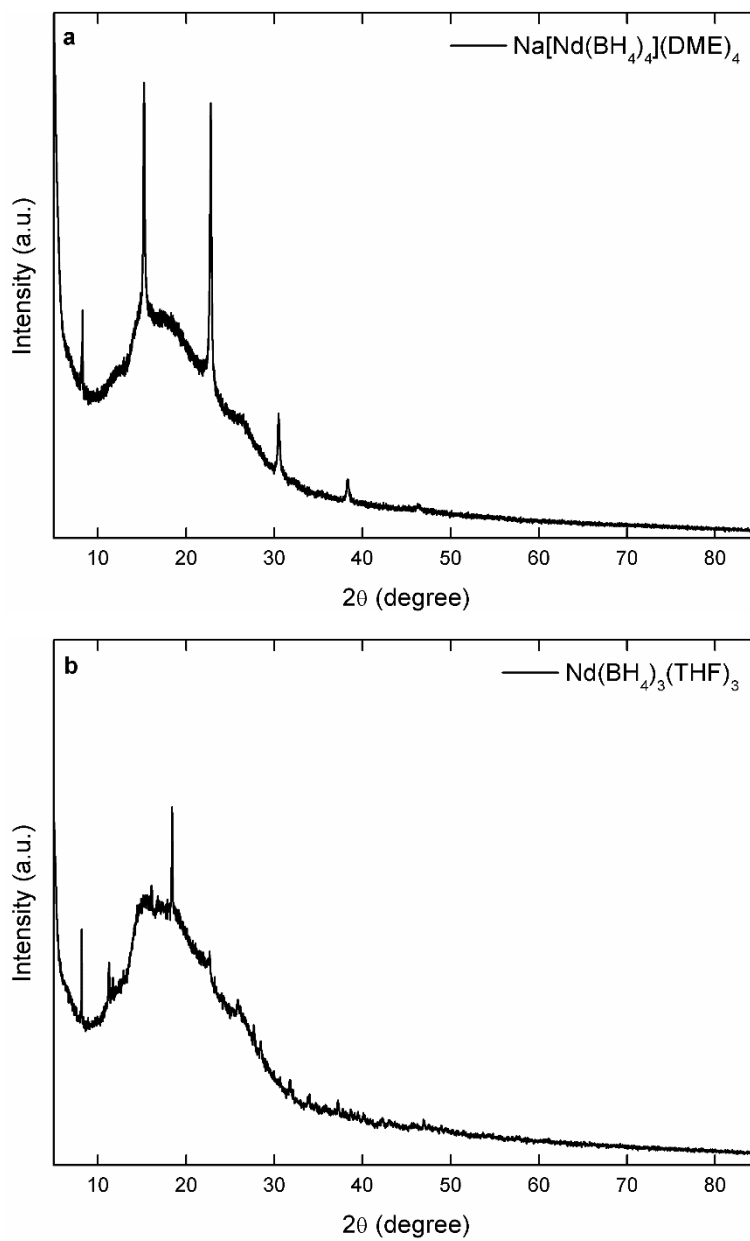

**Figure S1.** Powder XRD diffractograms of the complexes  $\text{Na}[\text{Nd}(\text{BH}_4)_4](\text{DME})_4$  (a) and  $\text{Nd}(\text{BH}_4)_3(\text{THF})_3$  (b), recorded in the range  $2\theta = 5^\circ\text{--}85^\circ$ . The broad signal is caused by a layer of Kapton tape, protecting the sample from the atmosphere during the measurement.

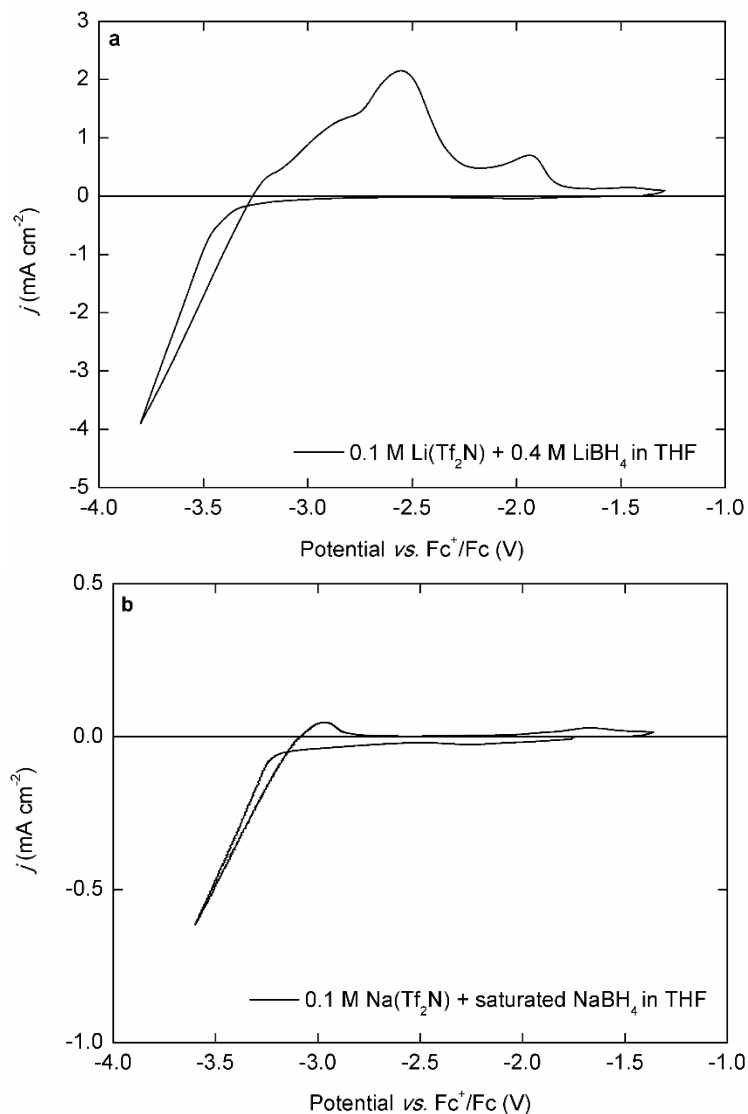

**Figure S2.** CVs (first cycle) of 0.1 M Li(Tf<sub>2</sub>N) + 4 molar equivalents of LiBH<sub>4</sub> (a), and 0.1 mol L<sup>-1</sup> NaTf<sub>2</sub>N + saturated NaBH<sub>4</sub> (b) in THF, recorded at ambient temperature at a scan rate of 10 mV s<sup>-1</sup>. The working and counter electrodes were pieces of platinum-coated silicon wafers with a surface area of 0.3 cm<sup>2</sup> and 1.0 cm<sup>2</sup>, respectively. The reference electrode was Fc<sup>+</sup>/Fc (0.005 mol L<sup>-1</sup> each) dissolved in [BMP][Tf<sub>2</sub>N]. The scan rate was 10 mV s<sup>-1</sup>.

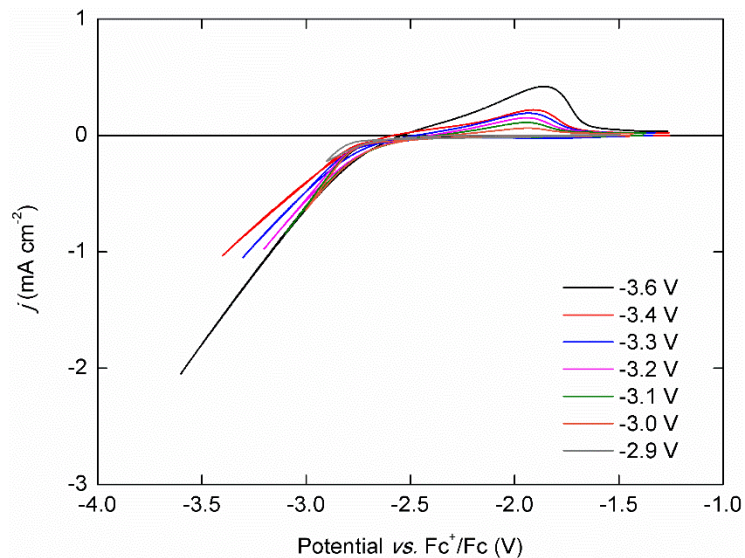

**Figure S3.** CVs (first cycle) of  $0.1 \text{ mol L}^{-1} \text{ Na}[\text{Nd}(\text{BH}_4)_4](\text{DME})_4$  in THF with varying cathodic vertex potential, recorded at ambient temperature at a scan rate of  $10 \text{ mV s}^{-1}$ . The working and counter electrodes were pieces of platinum-coated silicon wafers with a surface area of  $0.3 \text{ cm}^2$  and  $1.0 \text{ cm}^2$ , respectively. The reference electrode was  $\text{Fc}^+/\text{Fc}$  ( $0.005 \text{ mol L}^{-1}$  each) dissolved in  $[\text{BMP}][\text{Tf}_2\text{N}]$ .

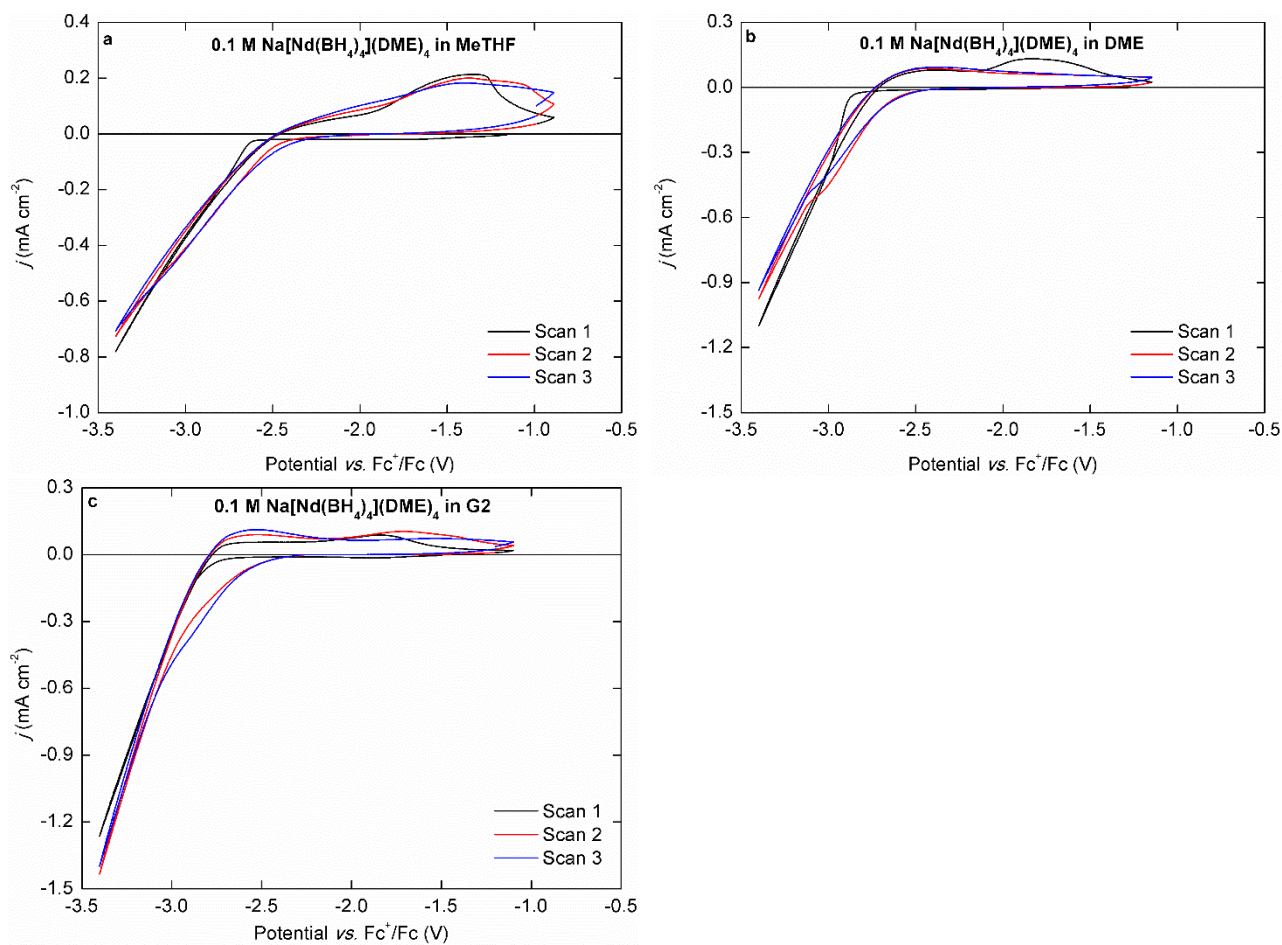

**Figure S4.** CVs (three scans) of 0.1 mol L<sup>-1</sup> Na[Nd(BH<sub>4</sub>)<sub>4</sub>](DME)<sub>4</sub> in (a) MeTHF, (b) DME, and (c) G2, recorded at ambient temperature at a scan rate of 10 mV s<sup>-1</sup>. The working and counter electrodes were pieces of platinum-coated silicon wafers with a surface area of 0.3 cm<sup>2</sup> and 1.0 cm<sup>2</sup>, respectively. The reference electrode was Fc<sup>+</sup>/Fc (0.005 mol L<sup>-1</sup> each) dissolved in [BMP][Tf<sub>2</sub>N].

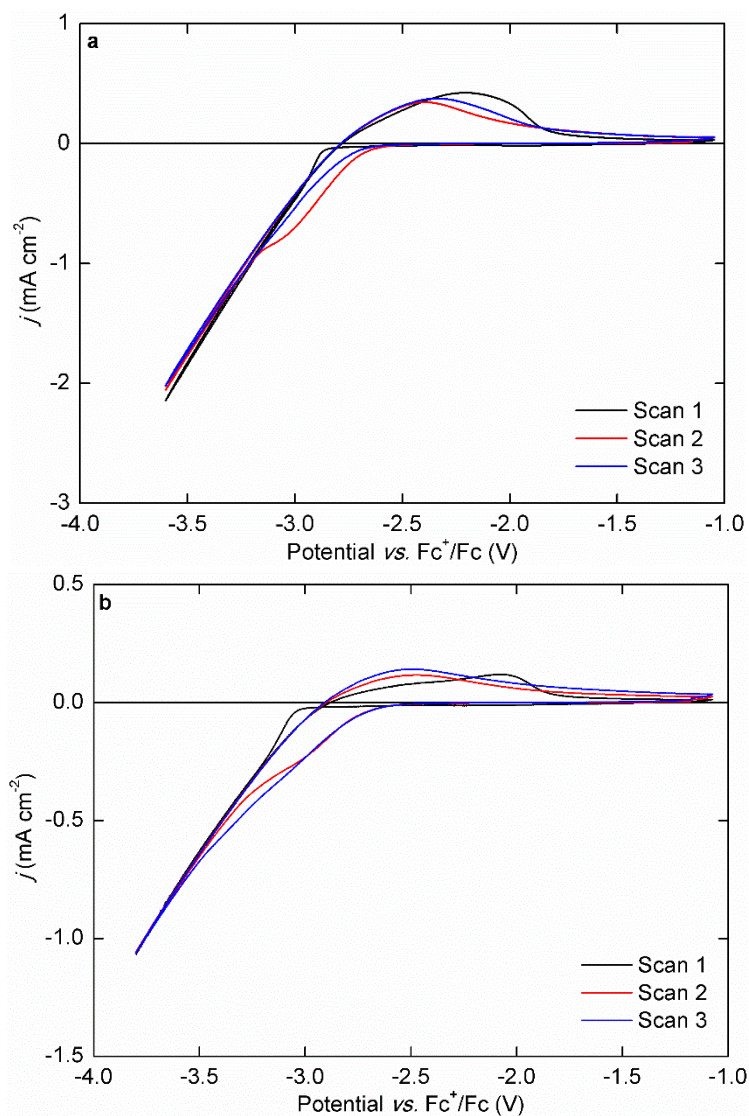

**Figure S5.** CVs (three scans) of (a)  $0.1 \text{ mol L}^{-1} \text{Nd}(\text{BH}_4)_3(\text{THF})_3 + 0.1 \text{ mol L}^{-1} \text{LiBH}_4$  in THF, and (b)  $0.1 \text{ mol L}^{-1} \text{Nd}(\text{BH}_4)_3(\text{THF})_3 + 0.1 \text{ mol L}^{-1} \text{TBABH}_4$  in THF, recorded at ambient temperature at a scan rate of  $10 \text{ mV s}^{-1}$ . The working and counter electrodes were pieces of platinum-coated silicon wafers with a surface area of  $0.3 \text{ cm}^2$  and  $1.0 \text{ cm}^2$ , respectively. The reference electrode was  $\text{Fc}^+/\text{Fc}$  ( $0.005 \text{ mol L}^{-1}$  each) dissolved in  $[\text{BMP}][\text{Tf}_2\text{N}]$ .

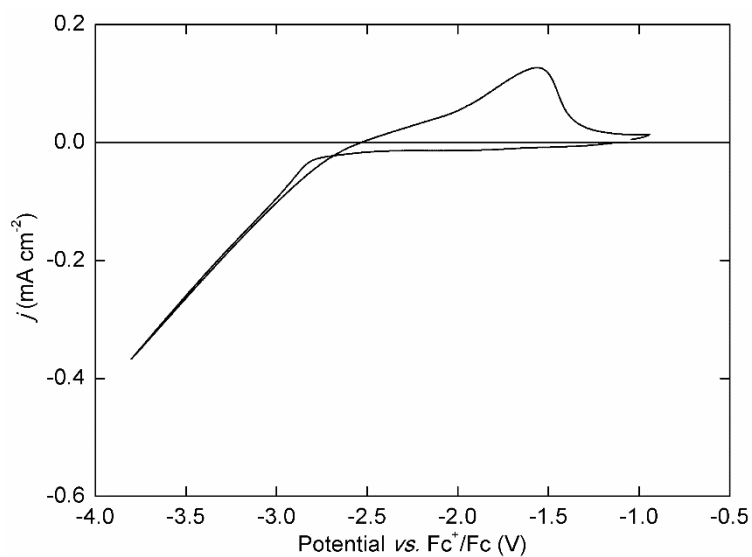

**Figure S6.** CV of 0.1 mol L<sup>-1</sup> Nd(BH<sub>4</sub>)<sub>3</sub>(THF)<sub>3</sub> in THF, recorded at ambient temperature at a scan rate of 10 mV s<sup>-1</sup>. The working and counter electrodes were pieces of platinum-coated silicon wafers with a surface area of 0.3 cm<sup>2</sup> and 1.0 cm<sup>2</sup>, respectively. The reference electrode was Fc<sup>+</sup>/Fc (0.005 mol L<sup>-1</sup> each) dissolved in [BMP][Tf<sub>2</sub>N].

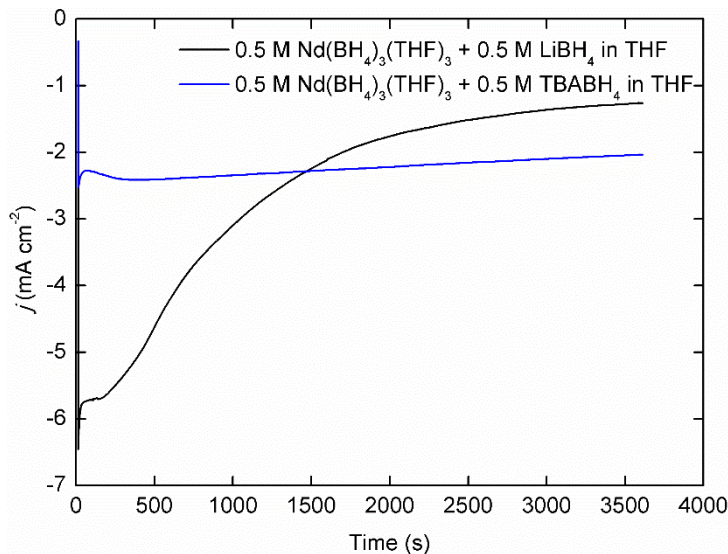

**Figure S7.** Chronoamperograms recorded at ambient temperature for a potentiostatic deposition at  $-3.1$  V vs.  $\text{Fc}^+/\text{Fc}$  for 3600 s in a static solution of  $0.5 \text{ mol L}^{-1} \text{Nd}(\text{BH}_4)_3(\text{THF})_3$  + one molar equivalent of  $\text{LiBH}_4$  in THF (black curve), and at  $-3.3$  V vs.  $\text{Fc}^+/\text{Fc}$  for 3600 s in a static solution of  $0.5 \text{ mol L}^{-1} \text{Nd}(\text{BH}_4)_3(\text{THF})_3$  + one molar equivalent of  $\text{TBABH}_4$  in THF (blue curve). The working and counter electrodes were pieces of platinum-coated silicon wafers with a surface area of  $0.3 \text{ cm}^2$  and  $1.0 \text{ cm}^2$ , respectively. The reference electrode was  $\text{Fc}^+/\text{Fc}$  ( $0.005 \text{ mol L}^{-1}$  each) dissolved in  $[\text{BMP}][\text{Tf}_2\text{N}]$ .



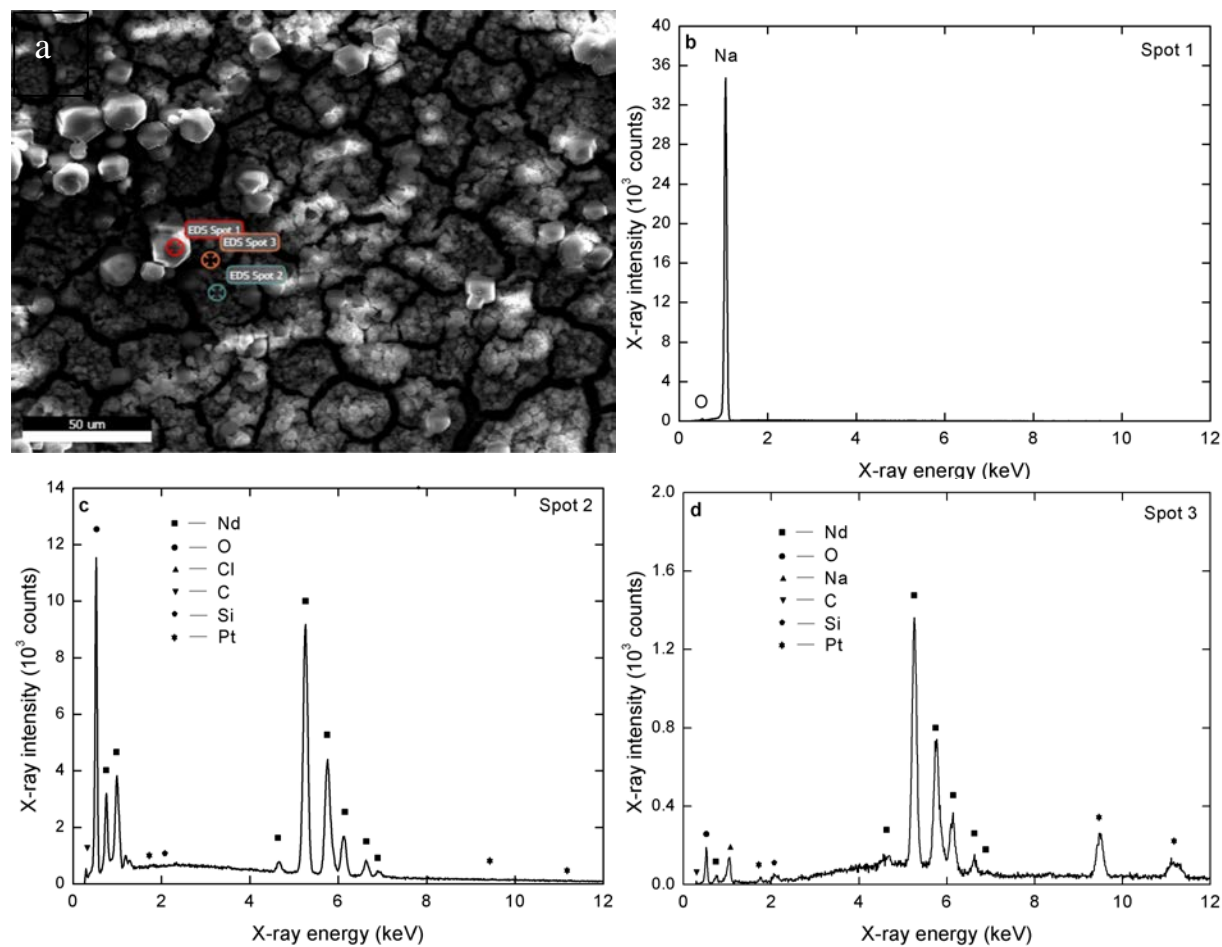

**Figure S8.** (a) SEM micrograph of a neodymium deposit (theoretical thickness = 2.8  $\mu\text{m}$ ) at 500 $\times$  magnification that was obtained after potentiostatic electrodeposition from 0.1 mol L<sup>-1</sup> Na[Nd(BH<sub>4</sub>)<sub>4</sub>] in THF at -3.0 V vs. Fc<sup>+</sup>/Fc for 2.5 hours. The substrate was a piece of platinum-coated silicon wafer with an approximate surface area of 0.3 cm<sup>2</sup>. (b, c, d) EDX spectra in the range 0–12 keV corresponding to the different spots indicated on the SEM micrograph, recorded at an acceleration voltage of 20 kV.

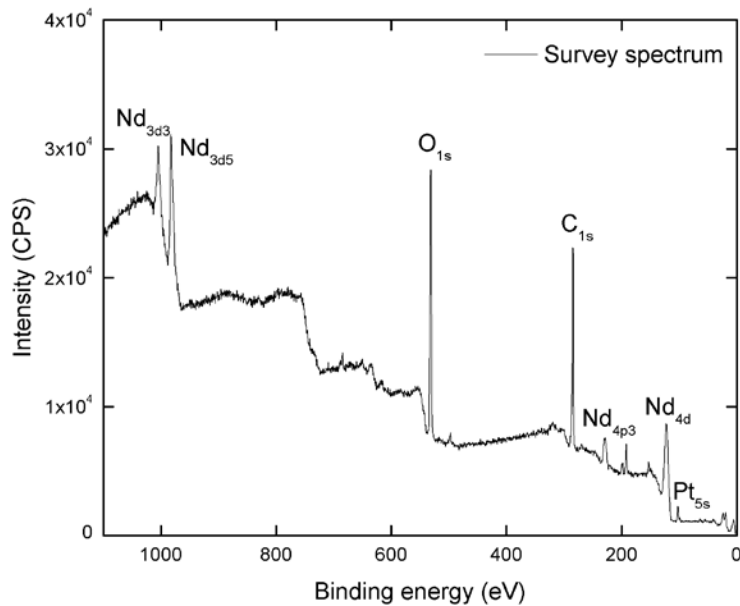

**Figure S9.** XPS survey scan in the range 0–1100 eV of a neodymium deposit obtained from potentiostatic deposition in 0.1 mol L<sup>-1</sup> Na[Nd(BH<sub>4</sub>)<sub>4</sub>] in THF electrolyte at -3.0 V vs. Fc<sup>+</sup>/Fc for 2.5 hours.
